# Supplementary material for: Physical properties of {Ti,Zr,Hf}2Ni2Sn compounds
Source: Royal Society of Chemistry journal article supplement (doi:10.1039/d1dt03198h), 2021-11-24
Supplement: d1dt03198h1.pdf [file d1dt03198h1.pdf]

## Supplementary Material

### Physical Properties of {Ti,Zr,Hf}<sub>2</sub>Ni<sub>2</sub>Sn Compounds

V.V. Romaka<sup>1,2</sup>, G. Rogl<sup>1</sup>, V. Buršíková<sup>3</sup>, J. Buršík<sup>4</sup>, H. Michor<sup>5</sup>, A. Grytsiv<sup>1</sup>,  
E. Bauer<sup>5</sup>, G. Giester<sup>6</sup>, P. Rogl<sup>1</sup>

<sup>1</sup> Institute of Materials Chemistry, Universität Wien, Währingerstr. 42, A-1090 Wien, Austria

<sup>2</sup> Leibniz Institute for Solid State and Materials Research Dresden (IFW Dresden),  
Helmholtzstr. 20, D-01069 Dresden, Germany

<sup>3</sup> Institute of Physical Electronics, Masaryk University, Kotlářská 2, 61137 Brno, Czech Republic

<sup>4</sup> Institute of Physics of Materials, Czech Academy of Sciences, Žitkova 22, 61662 Brno, Czech Republic

<sup>5</sup> Institute of Solid State Physics, TU Wien, Wiedner Hauptstr. 8-10, A-1040 Wien, Austria

<sup>6</sup> Institute of Mineralogy and Crystallography, Universität Wien, Althanstr.14, A-1090 Wien, Austria.

#### Abstract

Physical properties i.e. electrical resistivity (4.2-800K), Seebeck coefficient (300-800K), specific heat (2-110K), Vickers Hardness and elastic moduli (RT) have been defined for single-phase compounds at slightly nonstoichiometric compositions: Ti<sub>2.13</sub>Ni<sub>2</sub>Sn<sub>0.87</sub>, Zr<sub>2.025</sub>Ni<sub>2</sub>Sn<sub>0.975</sub>, Hf<sub>2.055</sub>Ni<sub>2</sub>Sn<sub>0.945</sub>. From X-ray single crystal and TEM analyses Ti<sub>2+x</sub>Ni<sub>2</sub>Sn<sub>1-x</sub>, x~0.13(1), is isotypic with the U<sub>2</sub>Pt<sub>2</sub>Sn-type (space group *P4<sub>2</sub>/mnm*, ternary ordered version of the Zr<sub>3</sub>Al<sub>2</sub>-type), also adopted by the homologous compounds with Zr, Hf.

For all three polycrystalline compounds (relative densities >95%) the electrical resistivity of the samples is metallic-like with dominant scattering from static defects mainly conditioned by off-stoichiometry. Analyses of the specific heat curves C<sub>p</sub> vs T and C<sub>p</sub>/T vs T<sup>2</sup> reveal Sommerfeld coefficients of  $\gamma_{\text{Ti}_2\text{Ni}_2\text{Sn}} = 14.3(3)$  mJ/molK<sup>2</sup>,  $\gamma_{\text{Zr}_2\text{Ni}_2\text{Sn}} = 10(1)$  mJ/molK<sup>2</sup>,  $\gamma_{\text{Hf}_2\text{Ni}_2\text{Sn}} = 9.1(5)$  mJ/molK<sup>2</sup> and low-temperature Debye-temperatures:  $\theta_{\text{D}}^{\text{LT}} = 373(7)$  K, 357(14) K and 318(10) K. Einstein temperatures were in the range 130-155 K. Rather low Seebeck coefficients (<15  $\mu\text{V/K}$ ), power factors ( $\text{pf} < 0.07$  mW/mK<sup>2</sup>) and an estimated thermal conductivity of  $\lambda < 148$  mWcm<sup>-1</sup>K<sup>-1</sup>, yield thermoelectric figures of merit  $ZT < 0.007$  at ~800 K.

Whereas for polycrystalline Zr<sub>2</sub>Ni<sub>2</sub>Sn elastic properties were determined by resonant ultrasonic spectroscopy (RUS): E = 171 GPa,  $\nu = 0.31$ , G = 65.5 GPa, B = 147 GPa, the accelerated mechanical property mapping (XPM) mode was used to map hardness and elastic moduli of T<sub>2</sub>Ni<sub>2</sub>Sn. Above 180 K, Zr<sub>2</sub>Ni<sub>2</sub>Sn reveals a quasi-linear expansion with CTE = 15.4×10<sup>-6</sup>K<sup>-1</sup>.

The calculated density of states is similar for all three compounds and confirms a metallic type of conductivity. The isosurface of *elf* shows a spherical shape for Ti/Zr/Hf atoms and indicates their ionic character, while the [Ni<sub>2</sub>Sn]<sup>n-</sup> sublattice reflects localizations around the Ni and Sn atoms with a large somewhat diffuse charge density between the closest Ni atoms.

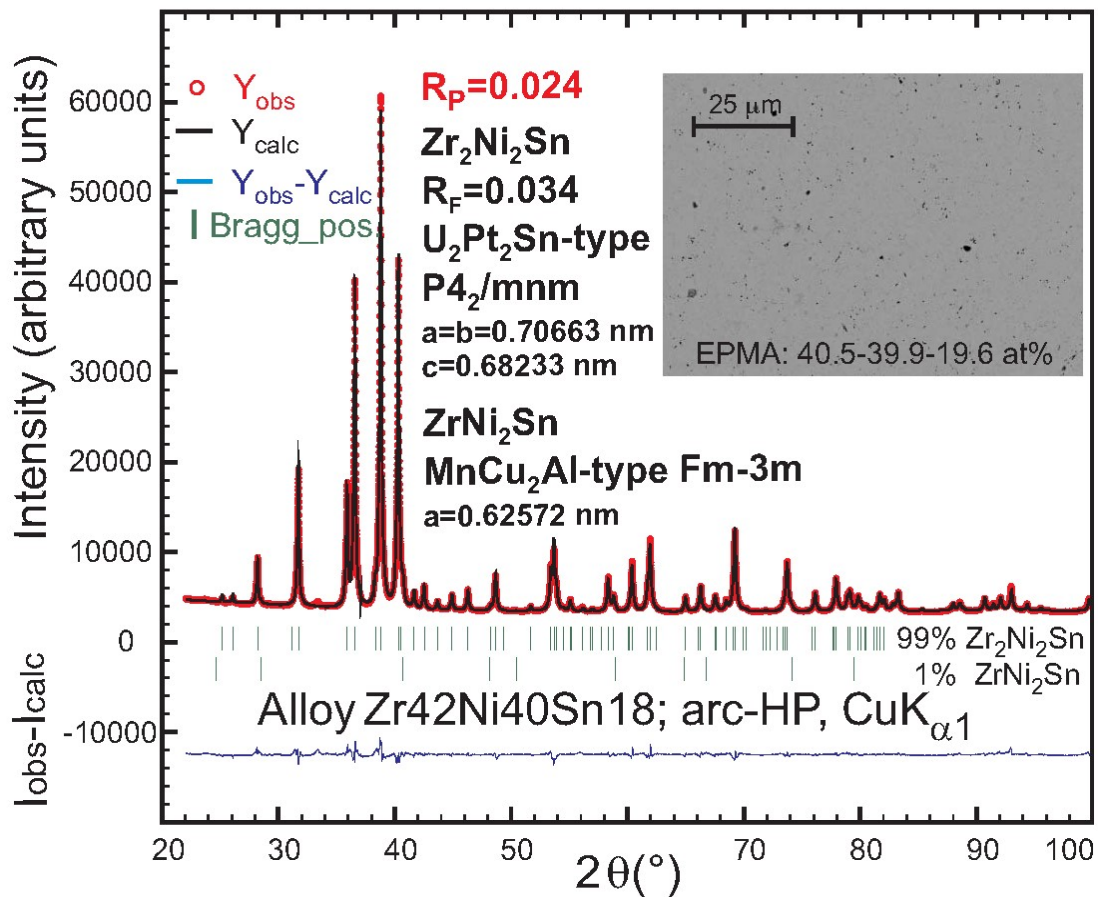

Fig. S1: Rietveld refinement of hot-pressed sample prepared from the nominal composition Zr<sub>42</sub>Ni<sub>40</sub>Sn<sub>18</sub> (in at.%). The insert shows the microstructure and the composition Zr<sub>2+x</sub>Ni<sub>2</sub>Sn<sub>1-x</sub>, x=0.025 from the corresponding backscatter photo.

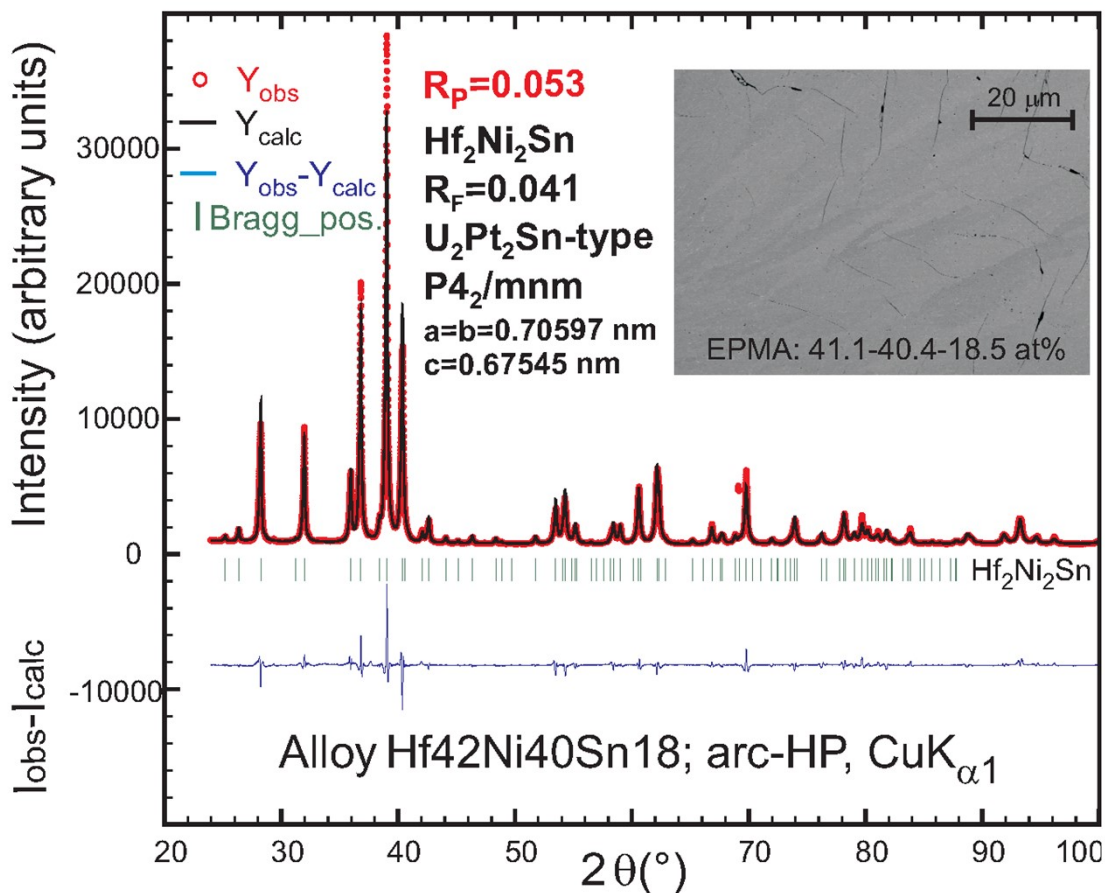

Fig. S2: Rietveld refinement of hot-pressed sample prepared from the nominal composition Hf<sub>42</sub>Ni<sub>40</sub>Sn<sub>18</sub> (in at.%). The insert shows the microstructure and the composition Hf<sub>2+x</sub>Ni<sub>2</sub>Sn<sub>1-x</sub>, x=0.055 from the corresponding backscatter photo.

Table S1: Interatomic distances < 0.4 nm for Ti<sub>2+x</sub>Ni<sub>2</sub>Sn<sub>1-x</sub>, x ~ 0.13(1). Standard deviations < 0.00008 nm.

| Atom1 - Atom 2      | Atom1 - Atom 2     |
|---------------------|--------------------|
| Ti1 - 4 Ni1 0.25466 | Ni - 1 Ni1 0.24643 |
| - 2 Ni1 0.25926     | - 1 Ti2 0.25412    |
| - 4 Sn1 0.29578     | - 2 Ti1 0.25466    |
| - 2 Ti2 0.32215     | - 1 Ti1 0.25926    |
| - 2 Ti2 0.33477     | - 2 Ti2 0.26502    |
| - 1 Ti1 0.35707     | - 2 Sn1 0.26932    |
| - 2 Ti2 0.38359     |                    |
| Ti2 - 2 Ni1 0.25412 | Sn - 4 Ni1 0.26932 |
| - 4 Ni1 0.26502     | - 4 Ti1 0.29578    |
| - 1 Ti2 0.28426     | - 4 Ti2 0.30553    |
| - 4 Sn1 0.30553     | - 2 Sn1 0.32009    |
| - 2 Ti1 0.32215     |                    |
| - 2 Ti1 0.33477     |                    |
